# Supplementary material for: Comparison between modified Dunn procedure and in situ fixation for severe stable slipped capital femoral epiphysis: A retrospective study of 29 hips followed for 2–7 years
Source: PubMed Central journal article supplement — Acta Orthop. 2018 Feb 16;89(2):211–6. doi: 10.1080/17453674.2018.1439238 (PMC5901520; doi:10.1080/17453674.2018.1439238), 2018-02-16
Supplement: IORT_A_1439238_SM9621.pdf [file IORT_A_1439238_SM9621.pdf]

## Supplementary data

Table 1. Demographic, clinical, and radiographic data on the patients included in the series

| A  | B       | C | D       | E   | F  | G | H   | I    | J                   | K  | L   | M   | N  | O   | P  | Q   | R                         |
|----|---------|---|---------|-----|----|---|-----|------|---------------------|----|-----|-----|----|-----|----|-----|---------------------------|
| 1  | F; 14.0 | L | 28 (96) | 1.4 | 66 | D | 2.0 | AVN  | THR                 | 7  | 56  | 38  | 14 | 7.5 | 13 | 3.8 | None                      |
| 2  | M; 18.0 | L | 27 (92) | 3.2 | 65 | D | 2.3 | None | None                | 15 | 55  | –   | –  | –   | –  | –   | –                         |
| 3  | M; 13.3 | R | 26 (95) | 1.9 | 59 | D | 2.3 | None | None                | 6  | 52  | 98  | 25 | 18  | 25 | 30  | Soccer, shot-put          |
| 4  | M; 14.7 | R | 32 (97) | 0.4 | 74 | D | 2.6 | HO   | None                | 4  | 73  | 90  | 25 | 16  | 25 | 24  | None                      |
| 5  | M; 17.4 | R | 24 (75) | 1.4 | 70 | D | 3.1 | AVN  | None                | 27 | 56  | 69  | 20 | 14  | 18 | 17  | Running                   |
| 6  | F; 12.2 | R | 24 (92) | 1.6 | 60 | D | 3.1 | None | None                | 0  | 46  | 86  | 25 | 18  | 24 | 20  | PE                        |
| 7  | F; 12.0 | R | 27 (97) | 0.2 | 67 | D | 3.6 | None | None                | 8  | 33  | 98  | 25 | 20  | 25 | 28  | None                      |
| 8  | M; 13.4 | L | 18 (37) | 0.9 | 61 | D | 3.6 | None | None                | 15 | 54  | 100 | 25 | 20  | 25 | 30  | Cycling                   |
| 9  | M; 15.9 | L | 21 (55) | 0.8 | 75 | D | 4.1 | None | None                | 19 | 85  | 100 | 25 | 20  | 25 | 30  | Soccer; skiing            |
| 10 | M; 15.5 | L | 27 (95) | 0.7 | 90 | D | 4.1 | None | None                | 6  | 55  | 96  | 25 | 18  | 25 | 29  | Soccer                    |
| 11 | F; 11.5 | L | 23 (91) | 0.4 | 53 | D | 4.2 | AVN  | THR                 | 0  | 33  | 50  | 19 | 7.5 | 16 | 8   | None                      |
| 12 | M; 9.6  | L | 19 (86) | 0.4 | 64 | D | 4.5 | None | None                | 18 | 33  | 95  | 25 | 20  | 25 | 25  | Swimming                  |
| 13 | M; 14.6 | R | 19 (41) | 0.6 | 54 | D | 5.0 | None | None                | 11 | 42  | 94  | 25 | 19  | 25 | 25  | Fitness                   |
| 14 | M; 11.7 | R | 25 (97) | 0.8 | 85 | D | 5.3 | None | None                | 7  | 47  | 89  | 25 | 19  | 25 | 20  | Cycling; swimming         |
| 15 | M; 14.6 | R | 21 (66) | 0.6 | 72 | D | 5.3 | None | None                | 3  | 37  | 93  | 24 | 18  | 24 | 28  | Swimming; soccer; running |
| 16 | F; 11.2 | L | 25 (95) | 0.3 | 69 | S | 3.1 | None | None                | 40 | 97  | 100 | 25 | 20  | 25 | 30  | PE                        |
| 17 | M; 13.6 | L | 23 (92) | 0.6 | 58 | S | 3.9 | None | None                | 27 | 74  | 100 | 25 | 20  | 25 | 30  | PE                        |
| 18 | F; 13.6 | L | 18 (36) | 1.4 | 65 | S | 4.0 | None | None                | 33 | 94  | 88  | 19 | 17  | 25 | 28  | None                      |
| 19 | M; 17.1 | L | 22 (63) | 0.1 | 86 | S | 4.2 | None | None                | 86 | 109 | 96  | 25 | 19  | 25 | 28  | Running                   |
| 20 | F; 11.8 | R | 28 (97) | 0.5 | 53 | S | 4.6 | FAI  | None                | 38 | 86  | 8   | 24 | 10  | 20 | 28  | PE                        |
| 21 | M; 14.0 | R | 24 (91) | 1.4 | 58 | S | 4.7 | None | None                | 27 | 85  | 100 | 25 | 20  | 25 | 30  | Soccer                    |
| 22 | M; 13.2 | L | 21 (78) | 0.3 | 50 | S | 5.3 | None | None                | 53 | 108 | 94  | 25 | 16  | 25 | 28  | Soccer                    |
| 23 | M; 12.2 | L | 28 (98) | 0.6 | 51 | S | 5.3 | None | None                | 46 | 101 | 99  | 25 | 19  | 25 | 30  | Soccer                    |
| 24 | F; 13.1 | R | 24 (91) | 0.3 | 69 | S | 6.1 | None | None                | 38 | 100 | –   | –  | –   | –  | –   | –                         |
| 25 | M; 12.1 | L | 23 (93) | 0.7 | 59 | S | 6.3 | None | None                | 39 | 76  | 90  | 23 | 15  | 23 | 30  | Soccer                    |
| 26 | M; 13.2 | L | 26 (96) | 0.2 | 59 | S | 6.0 | CL   | THR                 | 49 | 80  | 31  | 12 | 5   | 11 | 2.5 | None                      |
| 27 | M; 14.4 | L | 32 (97) | 0.6 | 66 | S | 6.5 | FAI  | D/THR               | 9  | 89  | 44  | 15 | 10  | 14 | 5   | None                      |
| 28 | M; 12.4 | L | 23 (92) | 0.1 | 67 | S | 6.5 | None | None                | 3  | 66  | –   | –  | –   | –  | –   | –                         |
| 29 | M; 14.0 | R | 18 (31) | 0.3 | 61 | S | 2.9 | FAI  | Osteo-chondroplasty | 42 | 76  | 81  | 24 | 14  | 24 | 20  | Swimming                  |

A. Case no.  
B. Sex and age (years)  
F – female  
M – male  
C. Side  
L – left  
R – right  
D. Body mass index (percentile)  
E. Time from initial symptoms (years)  
F. Pre-operative posterior sloping angle (°)  
G. Treatment  
D – modified Dunn procedure  
S – in situ fixation  
H. Follow-up (years)  
I. Complication  
AVN – avascular necrosis  
CL – Chondrolysis  
FAI – femoroacetabular impingement  
HO – heterotopic ossification  
J. Re-operation  
THR – total hip replacement  
K. Postoperative posterior sloping angle (°)  
L. Postoperative alpha angle (°)  
M. Nonarthritic Hip Score (total)  
N. Nonarthritic Hip Score (pain)  
O. Nonarthritic Hip Score (symptoms)  
P. Nonarthritic Hip Score (function)  
Q. Nonarthritic Hip Score (sport)  
R. Sport type  
PE – physical education.

Table 3. Estimated means and 95% confidence interval (CI) of the postoperative posterior sloping angle (PSA) and alpha angle in modified Dunn procedure (D) and in situ fixation (S). The results are presented as crude and adjusted for IPTW and follow-up duration

| Postoperative radiographic parameters | D group    | S group     | p-value <sup>a</sup> |
|---------------------------------------|------------|-------------|----------------------|
| Crude mean (CI)                       |            |             |                      |
| PSA (°)                               | 9 (1–18)   | 38 (30–46)  | < 0.001              |
| Alpha angle (°)                       | 50 (42–58) | 89 (81–97)  | < 0.001              |
| Adjusted mean (CI)                    |            |             |                      |
| PSA (°)                               | 7 (0–16)   | 40 (31–49)  | < 0.0001             |
| Alpha angle (°)                       | 47 (39–56) | 92 (83–100) | < 0.0001             |

IPTW = inverse probability of treatment weights.  
<sup>a</sup> 2-tailed

Table 4. Estimated means and 95% confidence interval (CI) of the postoperative Nonarthritic Hip Score (NAHS) in modified Dunn procedure (D) and in situ fixation (S). The results are presented as crude and adjusted for IPTW and follow-up duration

| Postoperative NAHS | D group    | S group    | p-value <sup>a</sup> |
|--------------------|------------|------------|----------------------|
| Crude mean (CI)    |            |            |                      |
| Total              | 85 (74–97) | 84 (71–96) | 0.9                  |
| Pain               | 23 (21–25) | 22 (20–24) | 0.5                  |
| Symptoms           | 17 (14–19) | 15 (13–18) | 0.5                  |
| Function           | 23 (20–25) | 22 (20–25) | 0.7                  |
| Sport              | 23 (18–28) | 24 (19–29) | 0.7                  |
| Adjusted mean (CI) |            |            |                      |
| Total              | 86 (73–98) | 83 (70–97) | 0.8                  |
| Pain               | 23 (21–25) | 22 (20–25) | 0.5                  |
| Symptoms           | 17 (14–19) | 15 (12–18) | 0.5                  |
| Function           | 23 (20–25) | 22 (19–24) | 0.6                  |
| Sport              | 23 (17–28) | 24 (18–30) | 0.8                  |

IPTW = inverse probability of treatment weights.  
<sup>a</sup> 2-tailed
